# Supplementary material for: A cubic room temperature polymorph of thermoelectric TAGS-85
Source: Royal Society of Chemistry journal article supplement (doi:10.1039/c8ra05768k), 2018-01-01
Supplement: c8ra05768k1.pdf [file c8ra05768k1.pdf]

## Supplementary Information

### A cubic room temperature polymorph of thermoelectric TAGS-85

*Anil Kumar,<sup>a</sup> Paul A. Vermeulen,<sup>a</sup> Bart J. Kooi,<sup>a</sup> Jiancun Rao,<sup>b</sup> Stefan Schwarzmüller,<sup>c</sup> Oliver Oeckler,<sup>c</sup> and Graeme R. Blake<sup>\*a</sup>*

<sup>a</sup>*Zernike Institute for Advanced Materials, University of Groningen, Nijenborgh 4, 9747 AG Groningen, The Netherlands.*

<sup>b</sup>*AIM Lab, Maryland NanoCenter, University of Maryland, College Park, Maryland 20742, United States.*

<sup>c</sup>*Institute for Mineralogy, Crystallography and Materials Science, Leipzig University, Scharnhorststraße 20, 04275 Leipzig, Germany.*

#### 1. Chemical composition analysis of as-prepared sample

**Table S1.** Chemical composition (and standard deviations in brackets) determined by EDS (Exp.) compared to nominal values (Calc.) for as-synthesized C<sub>RT</sub> phase of TAGS-85. Values are averaged over 10 measurements.

| Phase           | Ge atomic % |           | Te atomic % |           | Sb atomic % |          | Ag atomic % |          |
|-----------------|-------------|-----------|-------------|-----------|-------------|----------|-------------|----------|
|                 | Calc.       | Exp.      | Calc.       | Exp.      | Calc.       | Exp.     | Calc.       | Exp.     |
| C <sub>RT</sub> | 37.0        | 36.2(0.9) | 50.0        | 50.2(0.6) | 6.5         | 6.2(0.6) | 6.5         | 7.5(0.5) |

#### 2. Effect on crystal structure of holding time at 500 °C during initial cooling

The effect of different holding times at 500 °C during the initial cooling down process was studied. Portions of the X-ray diffraction patterns of some of the products obtained are shown in Fig. S1. The C<sub>RT</sub> phase can only be obtained on quenching after holding for 3 h, as evidenced by the single 220 peak at  $2\theta = 42.8^\circ$ . Holding for a shorter time gives an inhomogeneous product with an average rhombohedral structure, for which the cubic 220

peak is split into a doublet indexed as 211 ( $2\theta = 42.3^\circ$ ) and 10Error! ( $2\theta = 42.9^\circ$ ). Holding for longer than 3 h leads to progressively sharper rhombohedral peaks; annealing for at least 20 h is necessary to obtain a good quality sample.

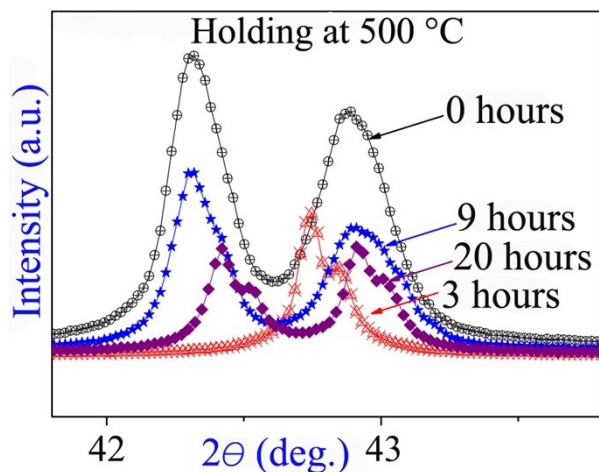

**Figure S1.** Partial room temperature XRD patterns showing the effect of holding time at 500 °C for 0, 3, 9 and 20 h during initial cooling down procedure.

### 3. Fitted X-ray diffraction pattern of as-synthesized $C_{RT}$ sample

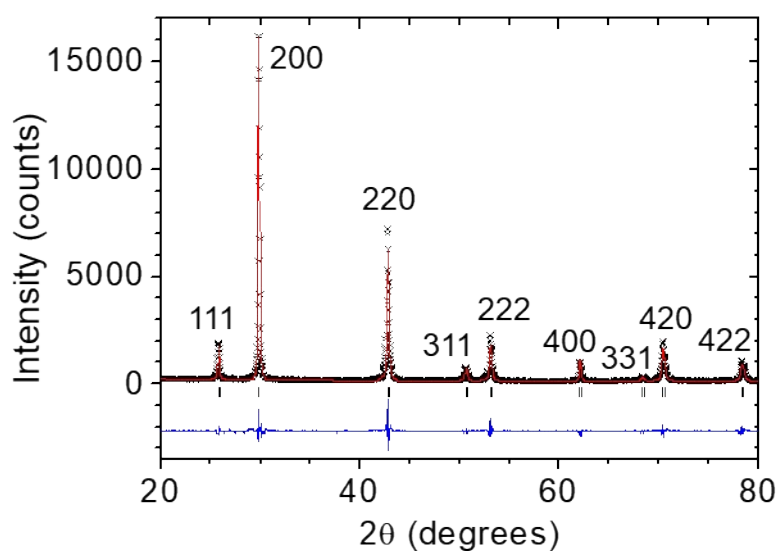

**Figure S2.** Observed (black data points), calculated (red line) and difference (blue line) XRD profiles of as-synthesized  $C_{RT}$  sample.

#### 4. SAED measurements of $C_{RT}$ phase

In an attempt to confirm whether a local rhombohedral distortion is present in the  $C_{RT}$  sample, and to investigate whether the sample preparation method might affect the structure, a number of further SAED patterns were collected on a second  $C_{RT}$  sample prepared for TEM measurements using the FIB technique (the sample measured in Fig. 1 was prepared using the ion milling technique). Figure S3 shows SAED patterns taken on the second sample along four different zone axes, [112], [011], [123] and [213]. The patterns appear to be fully consistent with cubic symmetry; there is no obvious spot splitting and the observed systematic absences ( $hkl$ , all indices odd or even) are consistent with the  $Fm\bar{3}m$  space group. However, it should be noted that more extensive electron diffraction measurements are required to prove or disprove the presence of a rhombohedral distortion with certainty.<sup>[1]</sup> Therefore, more research is required to understand the true nature of the  $C_{RT}$  phase.

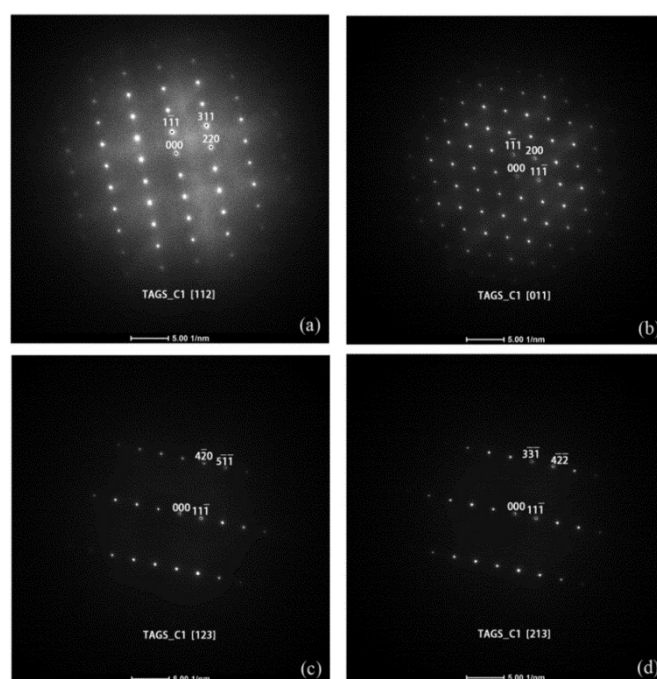

**Figure S3.** Selected area electron diffraction patterns taken on a  $C_{RT}$  sample along four different zone axes: a) [112], b) [011], c) [123], d) [213].

## 5. TGA/DSC measurements on C<sub>RT</sub> sample

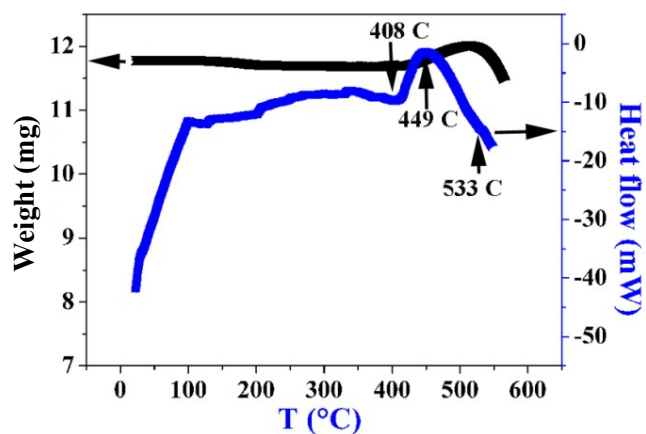

**Figure S4.** TGA (black curve) and DSC (blue curve) measurements on as-synthesized C<sub>RT</sub> phase heated in an argon atmosphere.

### Reference

[1] P. A. Vermeulen, A. Kumar, G. H. ten Brink, G. R. Blake and B. J. Kooi, *Cryst. Growth Des.* 2016, **16**, 5915.
